# Supplementary material for: Phosphorus and cobalt co-doped reduced graphene oxide bifunctional electrocatalyst for oxygen reduction and evolution reactions
Source: Royal Society of Chemistry journal article supplement (doi:10.1039/c6ra12438k), 2016-01-01
Supplement: c6ra12438k1.pdf [file c6ra12438k1.pdf]

## Supporting Information

### Phosphorus and cobalt co-doped reduced graphene oxide bifunctional electrocatalyst for oxygen reduction and evolution reactions

Xiangjun Zheng,<sup>ξa</sup> Zhenrong Yang,<sup>ξa</sup> Jiao Wu,<sup>a</sup> Chao Jin,<sup>a</sup> Jing-Hua Tian\*<sup>a</sup> and Ruizhi Yang\*<sup>a</sup>

<sup>a</sup> College of Physics, Optoelectronics and Energy & Collaborative Innovation Center of Suzhou Nano Science and Technology, Soochow University, Suzhou, 215006, China.

**Table S1** The comparison for the electrocatalytic activity of our catalysts with earlier reports.

| Catalyst            | Mass loading<br>(mg cm <sup>-2</sup> ) | Electrolyte | E <sub>onset,ORR</sub><br>(V) | E <sub>1/2, ORR</sub><br>(V) | Limited current<br>density around 0<br>V (vs. RHE) for<br>ORR (mA cm <sup>-2</sup> ) | E <sub>OER</sub> (V)<br>(10 mA cm <sup>-2</sup> ) | Reference |
|---------------------|----------------------------------------|-------------|-------------------------------|------------------------------|--------------------------------------------------------------------------------------|---------------------------------------------------|-----------|
| Co-P-G              | 0.4                                    | 0.1 M KOH   | 0.89                          | 0.82                         | 5.5                                                                                  | 1.62<br>(IR-corrected)                            | This work |
| IrO <sub>2</sub>    | 0.1                                    | 0.1 M KOH   | -                             | -                            | -                                                                                    | 1.60                                              | This work |
| N- CNTFs            | 0.2                                    | 0.1 M KOH   | 0.95                          | 0.87                         | 5.2                                                                                  | 1.60<br>(IR-corrected)                            | [S1]      |
| N-G/CNT             | 0.43                                   | 0.1 M KOH   | 0.88                          | 0.70                         | 5.0                                                                                  | 1.65<br>(IR-corrected)                            | [S2]      |
| P-ordered<br>MC     | 0.79                                   | 0.1 M KOH   | 0.85                          | 0.75                         | 5.2                                                                                  | -                                                 | [S3]      |
| N,P- carbon<br>foam | 0.15                                   | 0.1 M KOH   | 0.94                          | 0.85                         | 4.0-5.0                                                                              | 1.80                                              | [S5]      |
| N,P-G/CNS           | 0.14                                   | 0.1 M KOH   | 1.0                           | 0.88                         | 5.5                                                                                  | 1.57<br>(IR-corrected)                            | [S4]      |
| Fe-N-CC             | 0.1                                    | 0.1 M KOH   | 0.91                          | 0.83                         | 4.6                                                                                  | -                                                 | [S5]      |
| Fe/Co/Ni-<br>NCNTs  | 0.2                                    | 0.1 M KOH   | 0.89                          | 0.84                         | 6.0                                                                                  | 1.62<br>(IR-corrected)                            | [S6]      |
| Fe-P-C              | 0.04                                   | 0.1 M KOH   | 0.95                          | 0.78                         | 5.0                                                                                  | -                                                 | [44]      |

## References:

- [S1] B. Y. Xia, Y. Yan, N. Li, H. B. Wu, X. W. Lou and X. Wang, *Nat. Energy*, 2016, **1**, 15006.
- [S2] Z. H. Wen, S. Q. Ci, Y. Hou, and J. H. Chen, *Angew. Chem. Int. Ed.*, 2014, **53**, 6496-6500.
- [S3] D.-S. Yang, D. Bhattacharjya, S. Inamdar, J. Park and J.-S. Yu, *J. Am. Chem. Soc.*, 2012, **134**, 16127-16130.
- [S4] R. Li, Z. D. Wei and X. L. Gou, *ACS Catal.*, 2015, **56**, 4133-4142.
- [S5] G. A. Ferrero, K. Preuss, A. Marinovic, A. B. Jorge, N. Mansor, D. J. L. Brett, A. B. Fuertes, M. Sevilla and M.-M. Titirici, *ACS Nano*, 2016, DOI: 10.1021.
- [S6] Y. Y. Liu, H. L. Jiang, Y. H. Zhu, X. L. Yang and C. Z. Li, *J. Mater. Chem. A*, 2016, **4**, 1694–1701.
